# Supplementary material
Source: publisher figshare collection journal article supplement (https://acs.figshare.com/ndownloader/files/3887389)
Supplement: Supplementary file 1 [file 3887389]

C	4.907443547	1.231651358	3.96232805
C	6.123415241	0.441990106	3.96232805
C	5.748158685	-0.958486449	3.96232805
C	4.300265675	-1.034367306	3.96232805
C	3.780675151	0.319212301	3.96232805
C	7.222064017	0.863721859	3.2162988
C	7.982283544	-0.089442393	2.43857472
C	7.623702108	-1.427686553	2.43857472
C	6.48875056	-1.873041251	3.2162988
C	5.817158236	-2.890596932	2.43857472
C	4.43360465	-2.963105903	2.43857472
C	3.659327847	-2.021325012	3.2162988
C	2.484041441	-1.697044755	2.43857472
C	1.987539746	-0.403613603	2.43857472
C	2.643961917	0.623793695	3.2162988
C	2.589187286	1.84176559	2.43857472
C	3.66588595	2.713658974	2.43857472
C	4.845853959	2.406850708	3.2162988
C	5.987287784	2.835318489	2.43857472
C	7.149225855	2.080747085	2.43857472
C	4.079713535	3.345517326	1.20439728
C	5.509680007	3.420458694	1.20439728
C	8.391196021	0.545607866	1.20439728
C	7.878038614	1.882428629	1.20439728
C	1.885096963	1.568351866	1.20439728
C	1.514486506	0.185214792	1.20439728
C	2.526497473	-2.451163932	1.20439728
C	3.727414082	-3.231048297	1.20439728
C	6.547487825	-3.083254495	1.20439728
C	7.660305572	-2.18211245	1.20439728
C	8.143258791	-1.609869693	0
C	8.523324402	-0.191445514	0
C	7.483044155	2.518577176	0
C	6.251489336	3.318358229	0
C	3.35264032	3.16643599	0
C	2.211431971	2.242303688	0
C	1.986374267	-1.932538338	0
C	1.460124996	-0.56161211	0
C	5.887338324	-3.436678065	0
C	4.420890038	-3.513531363	0
C	7.660305572	-2.18211245	-1.20439728
C	6.547487825	-3.083254495	-1.20439728
C	7.878038614	1.882428629	-1.20439728
C	8.391196021	0.545607866	-1.20439728
C	5.509680007	3.420458694	-1.20439728
C	4.079713535	3.345517326	-1.20439728
C	3.727414082	-3.231048297	-1.20439728
C	2.526497473	-2.451163932	-1.20439728
C	1.514486506	0.185214792	-1.20439728
C	1.885096963	1.568351866	-1.20439728
C	2.589187286	1.84176559	-2.43857472
C	3.66588595	2.713658974	-2.43857472
C	5.987287784	2.835318489	-2.43857472
C	7.149225855	2.080747085	-2.43857472
C	7.982283544	-0.089442393	-2.43857472
C	7.623702108	-1.427686553	-2.43857472
C	5.817158236	-2.890596932	-2.43857472
C	4.43360465	-2.963105903	-2.43857472
C	1.987539746	-0.403613603	-2.43857472
C	2.484041441	-1.697044755	-2.43857472
C	6.48875056	-1.873041251	-3.2162988
C	3.659327847	-2.021325012	-3.2162988
C	2.643961917	0.623793695	-3.2162988
C	4.845853959	2.406850708	-3.2162988
C	7.222064017	0.863721859	-3.2162988
C	4.907443547	1.231651358	-3.96232805
C	6.123415241	0.441990106	-3.96232805
C	5.748158685	-0.958486449	-3.96232805
C	3.780675151	0.319212301	-3.96232805
C	4.300265675	-1.034367306	-3.96232805
C	-4.907443547	1.231651358	3.96232805
C	-6.123415241	0.441990106	3.96232805
C	-5.748158685	-0.958486449	3.96232805
C	-4.300265675	-1.034367306	3.96232805
C	-3.780675151	0.319212301	3.96232805
C	-7.222064017	0.863721859	3.2162988
C	-7.982283544	-0.089442393	2.43857472
C	-7.623702108	-1.427686553	2.43857472
C	-6.48875056	-1.873041251	3.2162988
C	-5.817158236	-2.890596932	2.43857472
C	-4.43360465	-2.963105903	2.43857472
C	-3.659327847	-2.021325012	3.2162988
C	-2.484041441	-1.697044755	2.43857472
C	-1.987539746	-0.403613603	2.43857472
C	-2.643961917	0.623793695	3.2162988
C	-2.589187286	1.84176559	2.43857472
C	-3.66588595	2.713658974	2.43857472
C	-4.845853959	2.406850708	3.2162988
C	-5.987287784	2.835318489	2.43857472
C	-7.149225855	2.080747085	2.43857472
C	-4.079713535	3.345517326	1.20439728
C	-5.509680007	3.420458694	1.20439728
C	-8.391196021	0.545607866	1.20439728
C	-7.878038614	1.882428629	1.20439728
C	-1.885096963	1.568351866	1.20439728
C	-1.514486506	0.185214792	1.20439728
C	-2.526497473	-2.451163932	1.20439728
C	-3.727414082	-3.231048297	1.20439728
C	-6.547487825	-3.083254495	1.20439728
C	-7.660305572	-2.18211245	1.20439728
C	-8.143258791	-1.609869693	0
C	-8.523324402	-0.191445514	0
C	-7.483044155	2.518577176	0
C	-6.251489336	3.318358229	0
C	-3.35264032	3.16643599	0
C	-2.211431971	2.242303688	0
C	-1.986374267	-1.932538338	0
C	-1.460124996	-0.56161211	0
C	-5.887338324	-3.436678065	0
C	-4.420890038	-3.513531363	0
C	-7.660305572	-2.18211245	-1.20439728
C	-6.547487825	-3.083254495	-1.20439728
C	-7.878038614	1.882428629	-1.20439728
C	-8.391196021	0.545607866	-1.20439728
C	-5.509680007	3.420458694	-1.20439728
C	-4.079713535	3.345517326	-1.20439728
C	-3.727414082	-3.231048297	-1.20439728
C	-2.526497473	-2.451163932	-1.20439728
C	-1.514486506	0.185214792	-1.20439728
C	-1.885096963	1.568351866	-1.20439728
C	-2.589187286	1.84176559	-2.43857472
C	-3.66588595	2.713658974	-2.43857472
C	-5.987287784	2.835318489	-2.43857472
C	-7.149225855	2.080747085	-2.43857472
C	-7.982283544	-0.089442393	-2.43857472
C	-7.623702108	-1.427686553	-2.43857472
C	-5.817158236	-2.890596932	-2.43857472
C	-4.43360465	-2.963105903	-2.43857472
C	-1.987539746	-0.403613603	-2.43857472
C	-2.484041441	-1.697044755	-2.43857472
C	-6.48875056	-1.873041251	-3.2162988
C	-3.659327847	-2.021325012	-3.2162988
C	-2.643961917	0.623793695	-3.2162988
C	-4.845853959	2.406850708	-3.2162988
C	-7.222064017	0.863721859	-3.2162988
C	-4.907443547	1.231651358	-3.96232805
C	-6.123415241	0.441990106	-3.96232805
C	-5.748158685	-0.958486449	-3.96232805
C	-3.780675151	0.319212301	-3.96232805
C	-4.300265675	-1.034367306	-3.96232805
